# Supplementary material for: Hybrid Lake Model (HyLake) v1.0: unifying deep learning and physical principles for simulating lake-atmosphere interactions
Source: Copernicus journal article supplement (doi:10.5194/egusphere-2025-1983), 2025-05-21
Supplement: Supplementary file 1 [file egusphere-2025-1983-supplement.pdf]

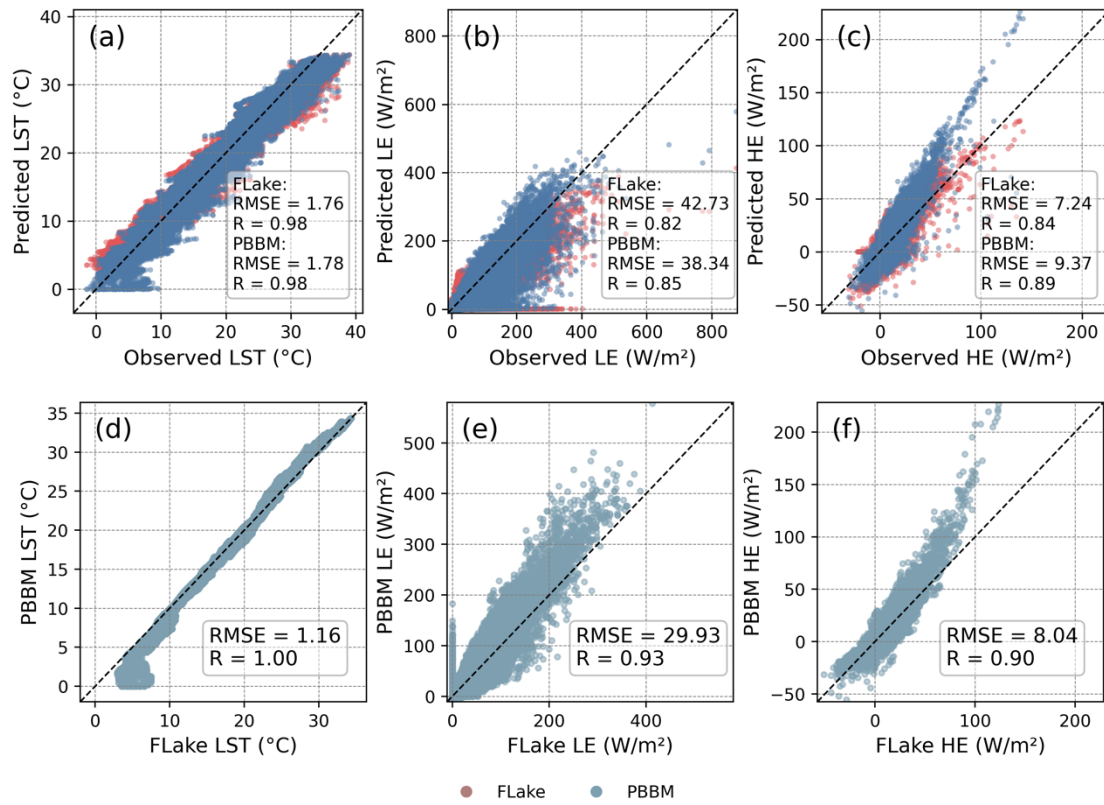

**Figure S1:** The comparison between FLake, PBBM and observations in LST, LE, and HE. **(a-c)** present the comparison of model performance between FLake, PBBM, and observations. **(d-f)** present the scatterplots between FLake and PBBM.

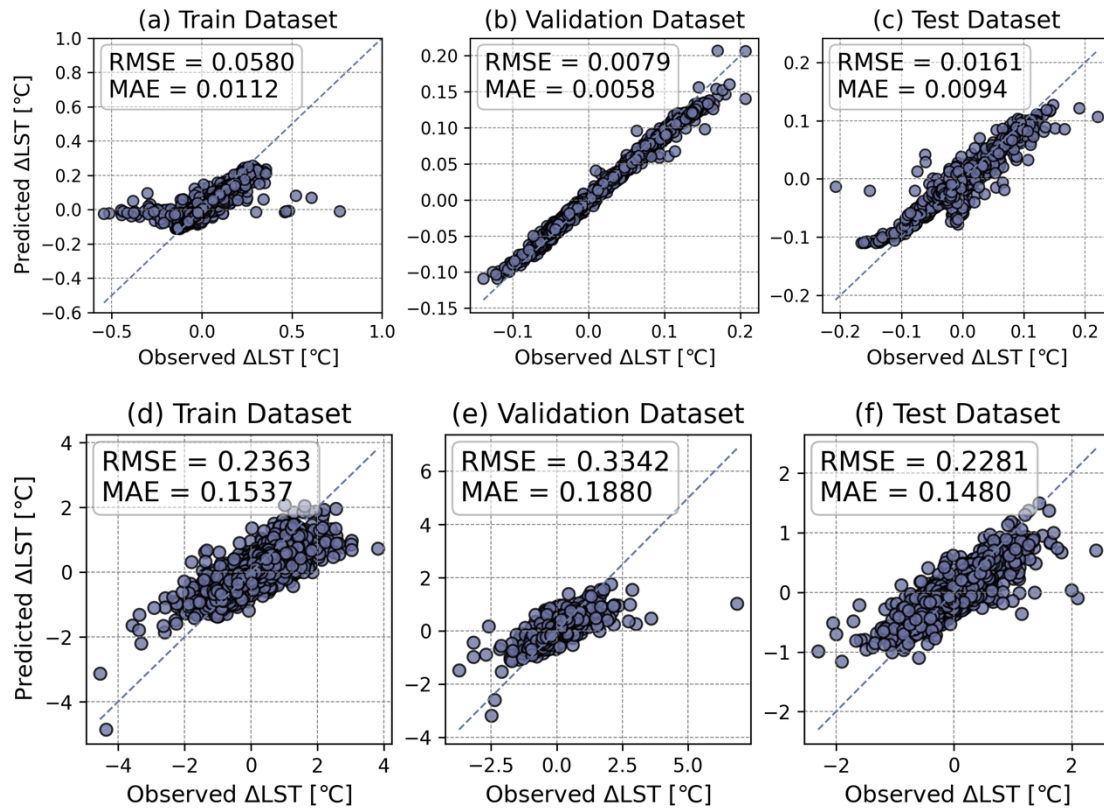

**Figure S2:** The separate performance of LSTM-based surrogates for Baseline (a-c) and TaihuScene (e-f) in train, validation, and test datasets, respectively.

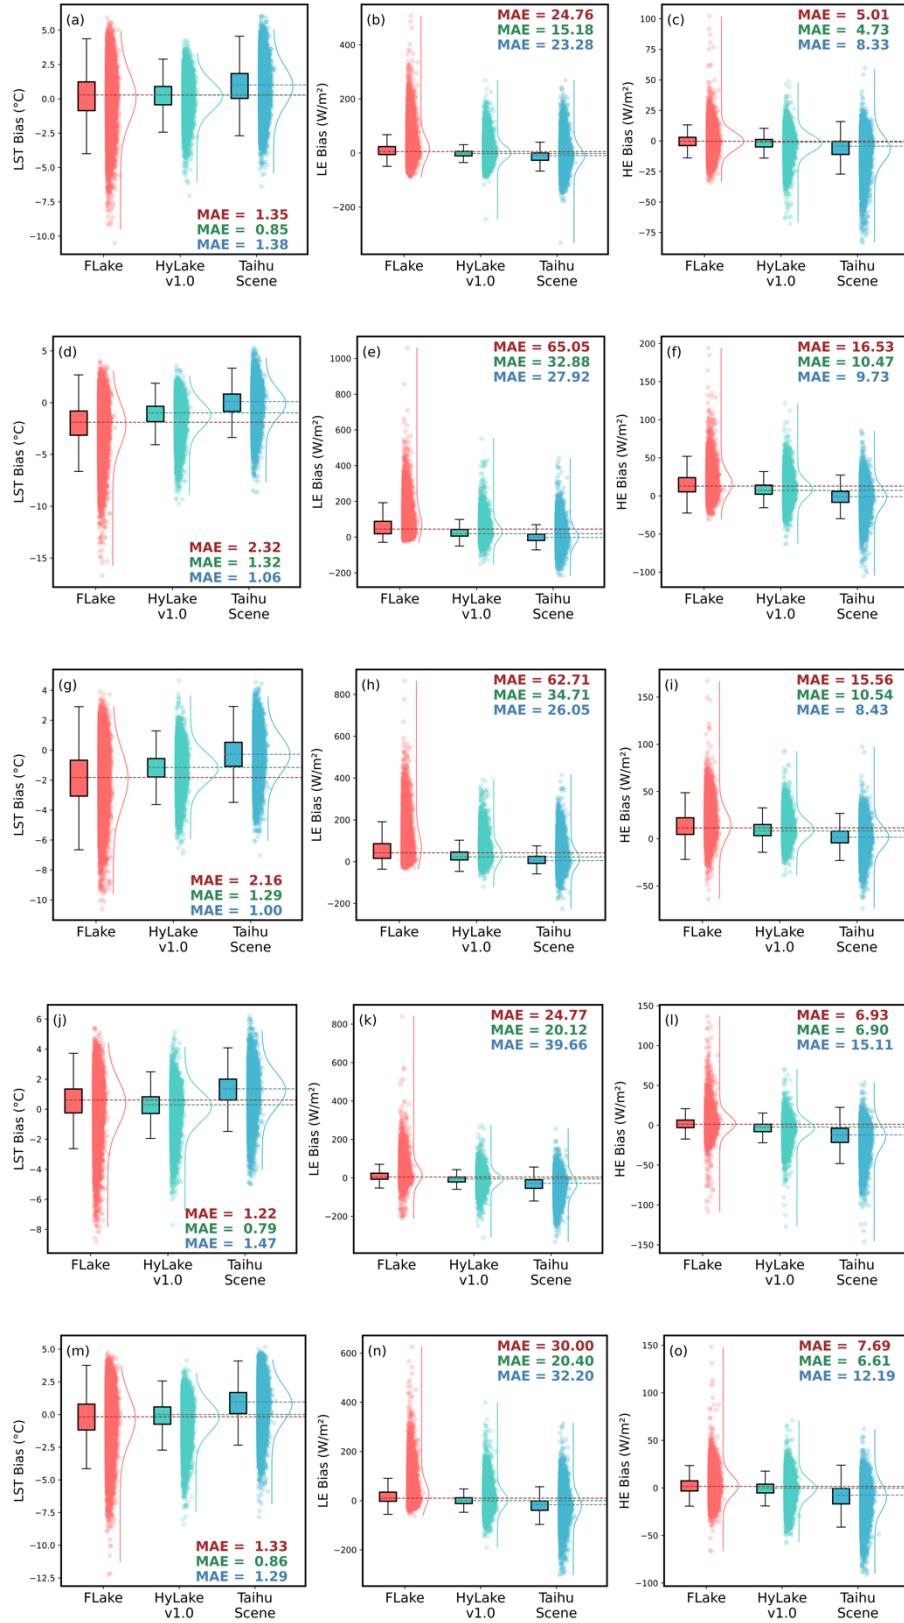

**Figure S3:** The intercomparison of LST, HE, and LE for each lake site between FLake, HyLake v1.0 and TaihuScene. MLW, BFG, DPK, PTS, and XLS site are (a-c), (d-f), (g-i), (j-l), and (m-n) in this Figure, respectively.

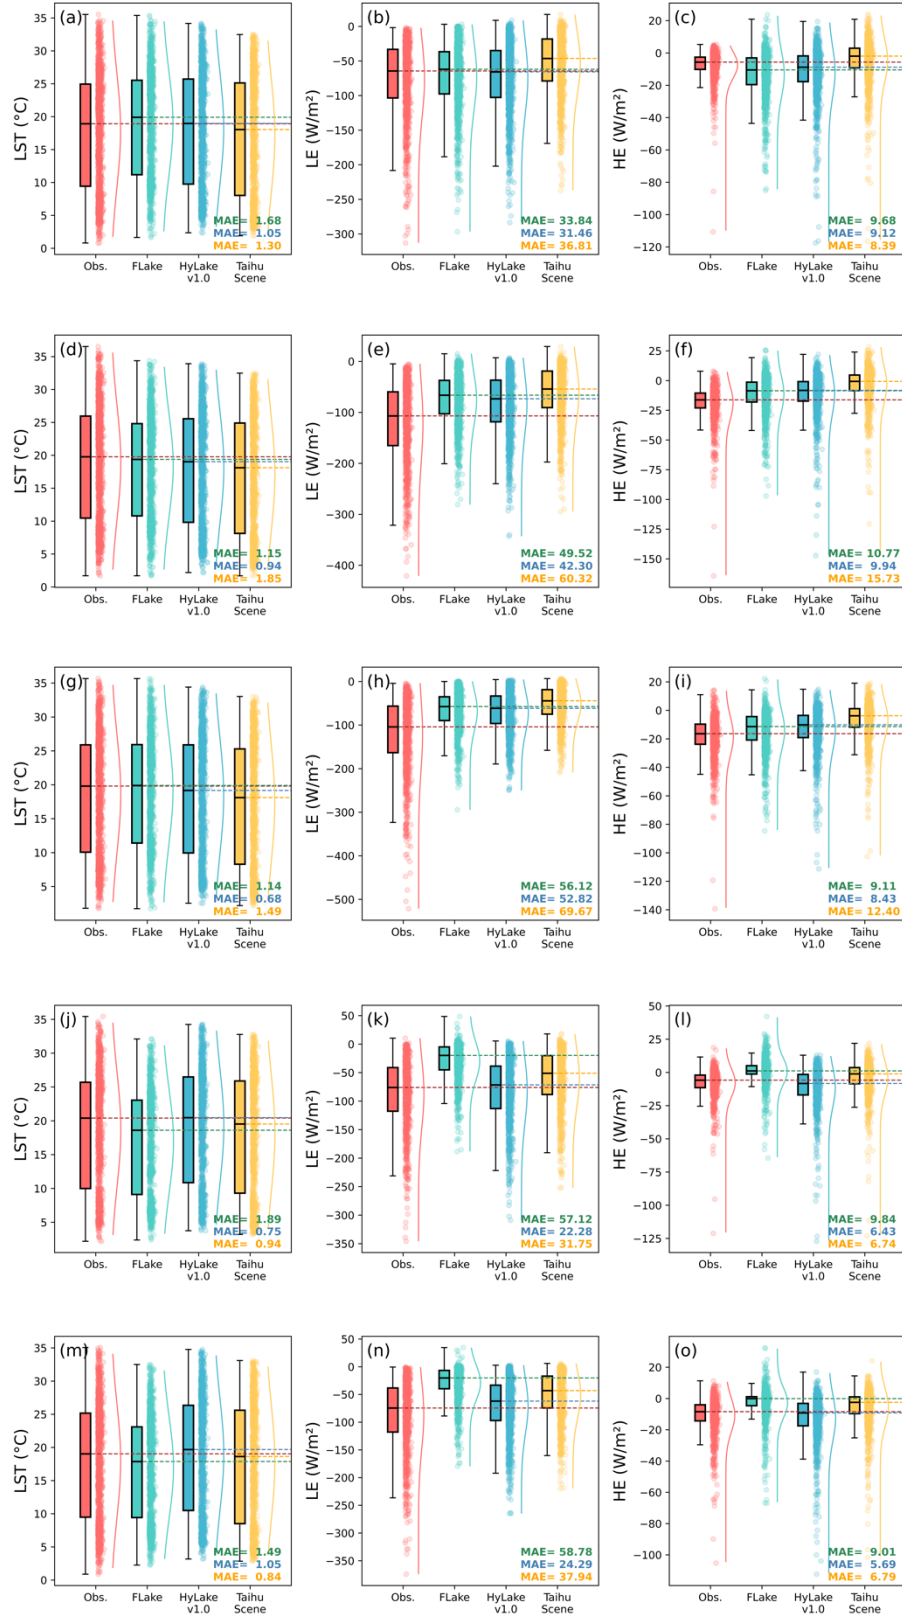

**Figure S4:** The comparison of LST, HE, and LE for each lake site between observations, FLake, HyLake v1.0 and TaihuScene under ERA5 reanalysis datasets. MLW, BFG, DPK, PTS, and XLS site are (a-c), (d-f), (g-i), (j-l), and (m-n) in this Figure, respectively.

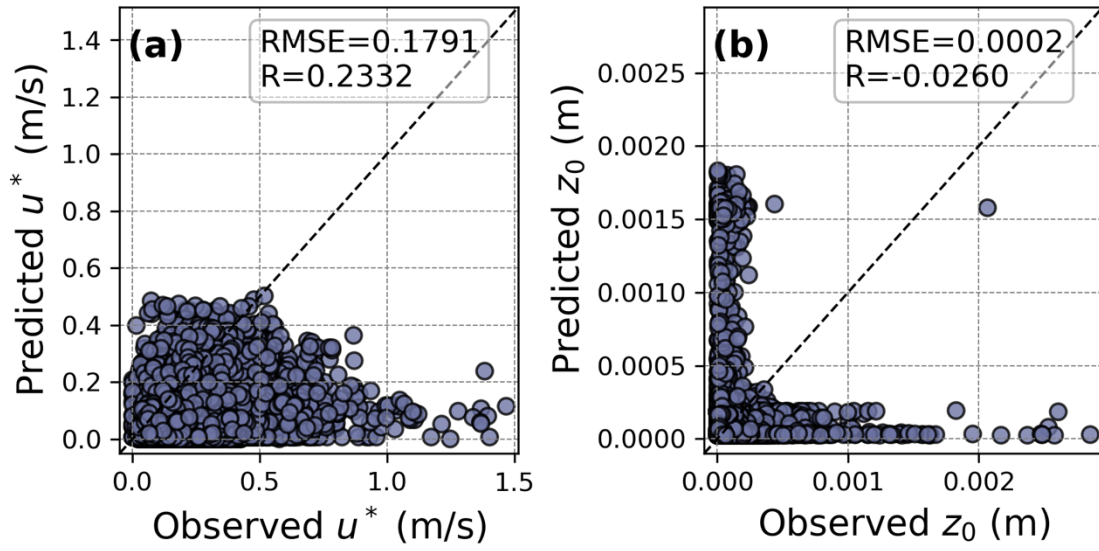

**Figure S5:** The comparison of friction velocity ( $u^*$ ) and surface roughness length ( $z_{0m}$ , m) in MLW lake site between simulation derived from PBBM and HyLake v1.0 and observations.
